# Supplementary material for: Integrative transcriptome and chromatin landscape analysis reveals distinct epigenetic regulations in human memory B cells
Source: PubMed Central journal article supplement (PMC7595102; doi:10.1038/s41467-020-19242-6), 2020-10-28
Supplement: 41467_2020_19242_MOESM1_ESM.pdf [file 41467_2020_19242_MOESM1_ESM.pdf]

## **SUPPLEMENTAL MATERIAL**

### **Integrative transcriptome and chromatin landscape analysis reveals distinct epigenetic regulations in human memory B cells**

Justin B. Moroney, Anusha Vasudev, Alexander Pertsemlidis, Hong Zan  
and Paolo Casali

## Supplementary Figures

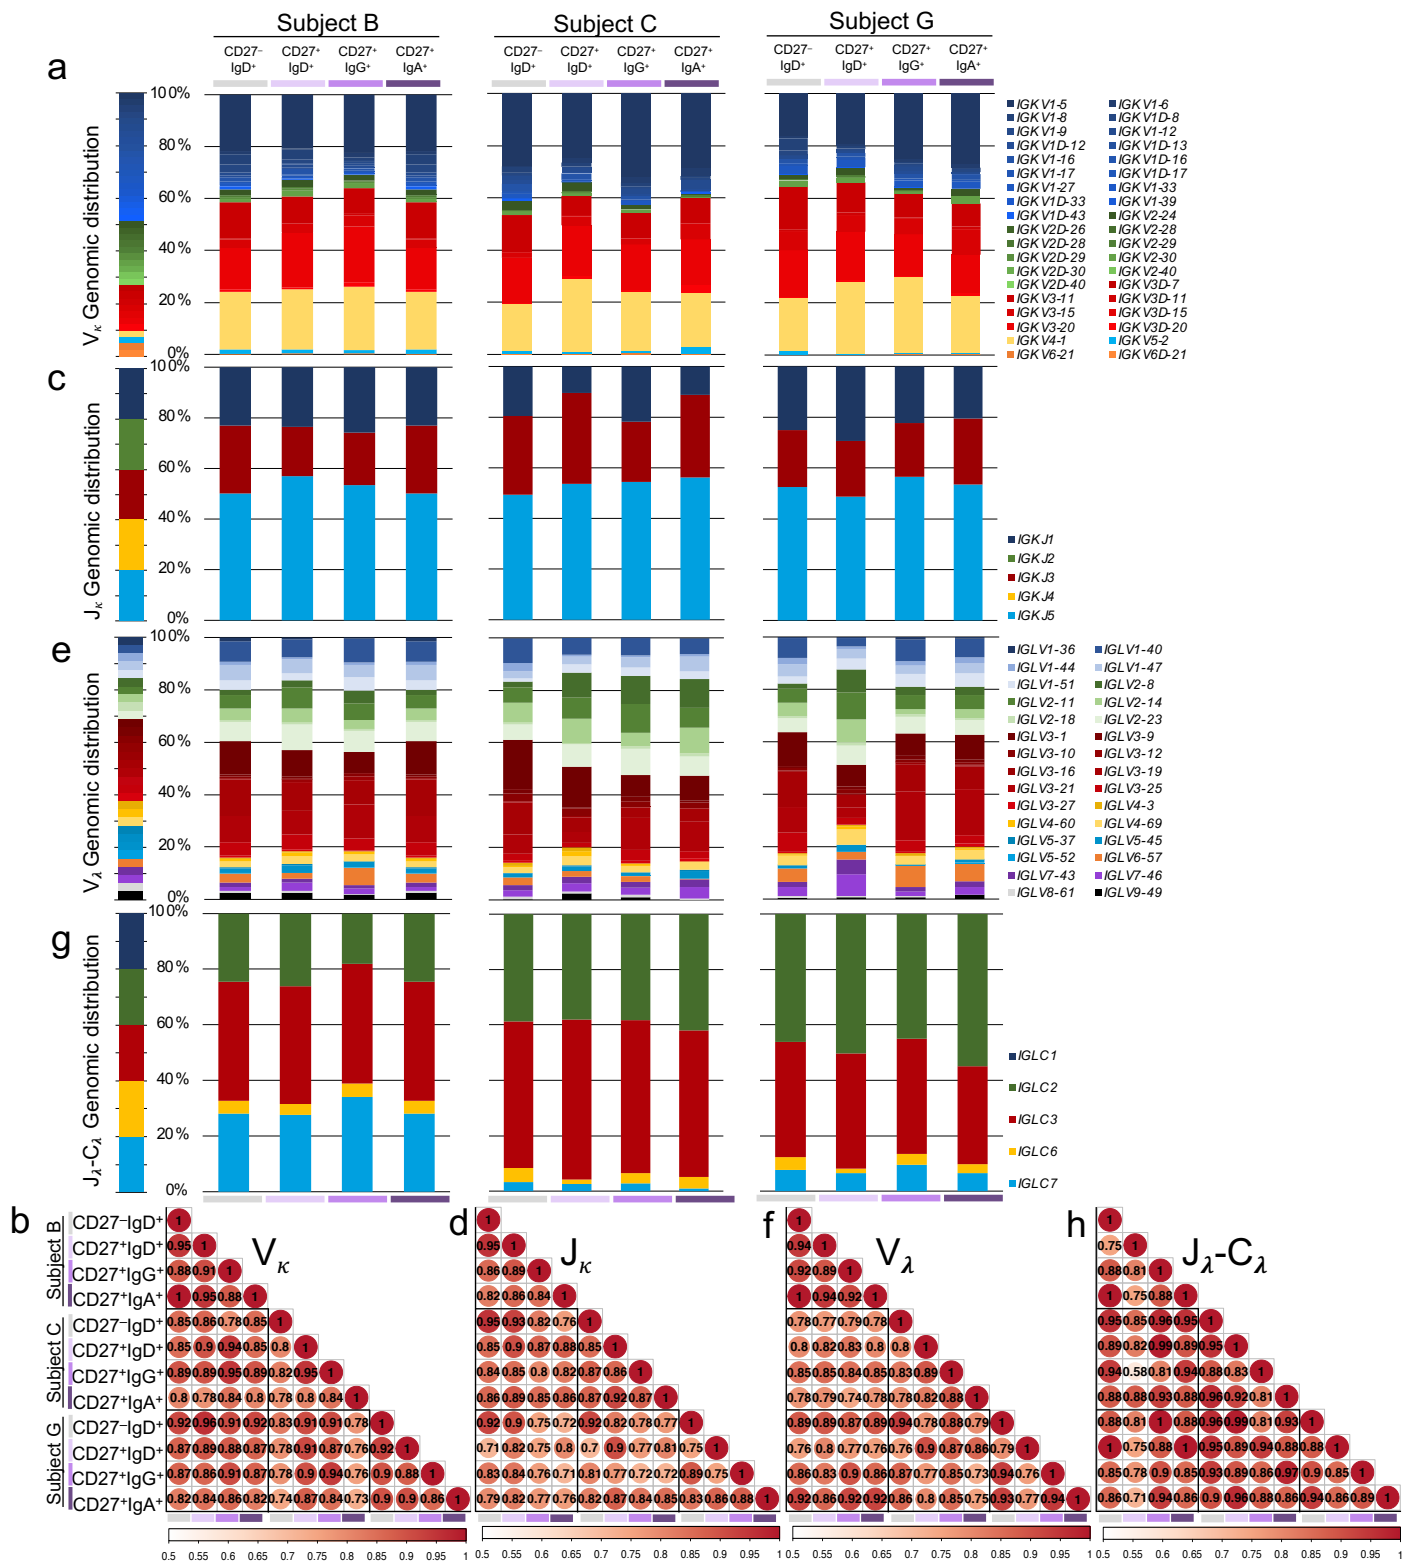

**Supplementary Fig.1 Expressed  $V_{\kappa}$ ,  $J_{\kappa}$ ,  $V_{\lambda}$  and  $J_{\lambda}$  genes in human CD27-IgD<sup>+</sup>, CD27<sup>+</sup>IgD<sup>+</sup>, CD27<sup>+</sup>IgG<sup>+</sup> and CD27<sup>+</sup>IgA<sup>+</sup> B cells. (a,c,e,g)** Ig  $V_{\kappa}$ (a),  $J_{\kappa}$ (c),  $V_{\lambda}$ (e) and  $J_{\lambda}$ - $C_{\lambda}$  (g) gene expression in CD27-IgD<sup>+</sup>, CD27<sup>+</sup>IgG<sup>+</sup>, CD27<sup>+</sup>IgA<sup>+</sup> and CD27<sup>+</sup>IgD<sup>+</sup> B cells, as depicted by stacked column for each subject (subjects B, C, G). Gene members grouped within a family are depicted in shades of the respective family/group color.  $V_{\kappa}$  family:  $V_{\kappa}1$  (blue),  $V_{\kappa}2$  (green),  $V_{\kappa}3$  (red),  $V_{\kappa}4$  (yellow),  $V_{\kappa}5$  (teal),  $V_{\kappa}6$  (orange).  $J_{\kappa}$  genes:  $J_{\kappa}1$  (orange),  $J_{\kappa}2$  (teal),  $J_{\kappa}3$  (yellow),  $J_{\kappa}4$  (red),  $J_{\kappa}5$  (blue).  $V_{\lambda}$  subgroups:  $V_{\lambda}1$  (blue),  $V_{\lambda}2$  (green),  $V_{\lambda}3$  (red),  $V_{\lambda}4$  (yellow),  $V_{\lambda}5$  (teal),  $V_{\lambda}6$  (orange),  $V_{\lambda}7$  (purple),  $V_{\lambda}8$  (grey),  $V_{\lambda}9$  (black).  $J_{\lambda}$ - $C_{\lambda}$  genes:  $J_{\lambda}1$ - $C_{\lambda}1$  (dark blue),  $J_{\lambda}2$ - $C_{\lambda}2$  (green),  $J_{\lambda}3$ - $C_{\lambda}3$  (red),  $J_{\lambda}6$ - $C_{\lambda}6$  (yellow),  $J_{\lambda}7$ - $C_{\lambda}7$  (teal).  $J_{\lambda}$  reads fall below the minimum expression threshold (>1 mapped read), thus  $C_{\lambda}$  expression was used as a surrogate for linked  $J_{\lambda}$ - $C_{\lambda}$  usage.(b,d,f,h) Correlation matrix showing the relationship of individual Ig  $V_{\kappa}$  (b),  $J_{\kappa}$  (d),  $V_{\lambda}$  (f) and  $J_{\lambda}$ - $C_{\lambda}$  (h) gene expression between B cell subsets in all 3 subjects. Color bars denote correlation coefficients on a scale from 0.5 (white) to 1 (red), with color, circle size and value indicating the overall strength of the correlation. B cell subsets are repeated along bottom, left to right (grey, lavender, purple, dark purple).

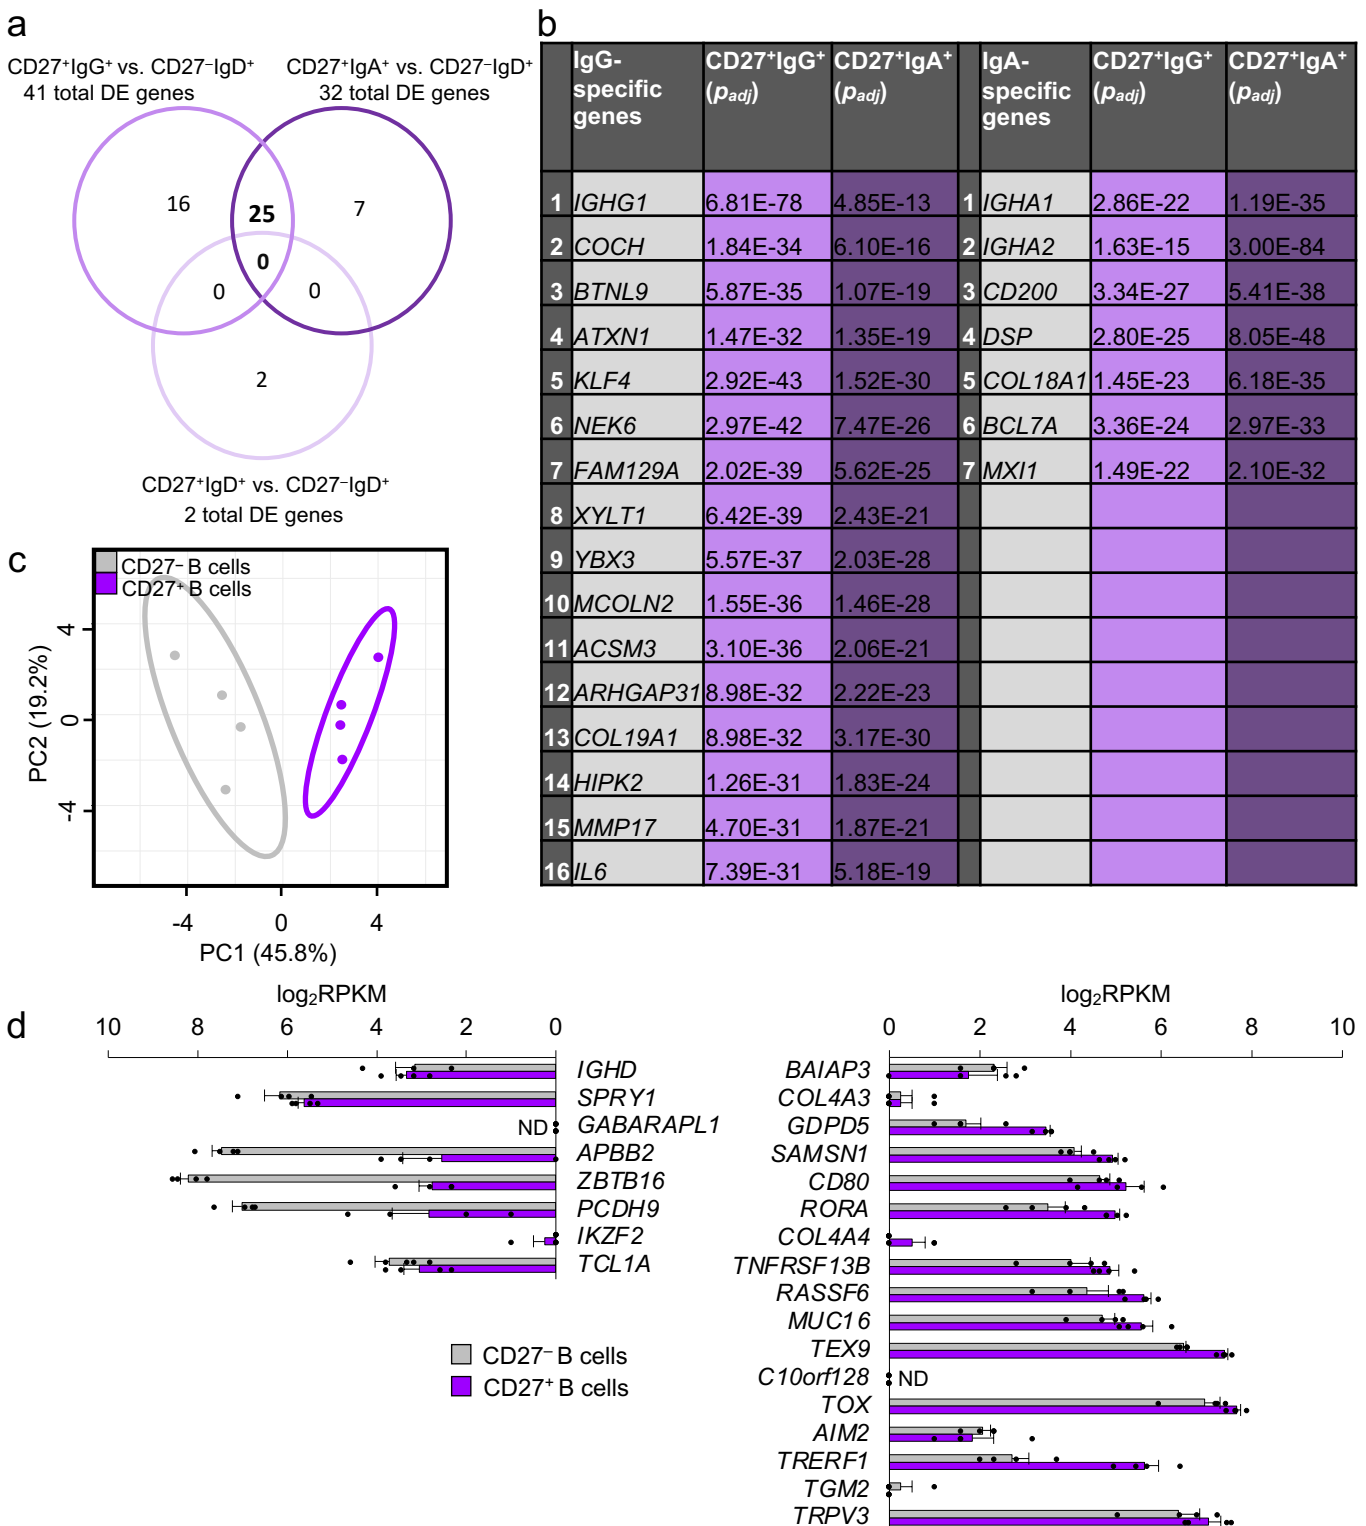

**Supplementary Fig. 2 Transcriptome analysis of human B cell sub-subsets.** **a**, Overlap of DE mRNA transcripts in CD27<sup>+</sup> B cell subsets, as compared to CD27<sup>-</sup>IgD<sup>+</sup> B cells at a  $p_{adj} < 10 \times 10^{-30}$  depicted by Venn diagram. **b**, CD27<sup>+</sup>IgG<sup>+</sup> and CD27<sup>+</sup>IgA<sup>+</sup> swMBC isotype-specific DE gene expression, as compared to CD27<sup>-</sup>IgD<sup>+</sup> NBCs at a  $p_{adj} < 10 \times 10^{-30}$  as determined by edgeR. **c**, Transcriptome clustering of CD27<sup>-</sup> and CD27<sup>+</sup> B cells was performed using the top 24 DE mRNA transcripts and depicted by PCA plot. Prediction ellipses denote 95% confidence intervals. Each symbol represents an individually sorted subset ( $n = 4$ ). **d**, Normalized ( $\log_2$ RPKM) expression of the 24 mRNAs that comprise the swMBC signature are depicted by histogram for CD27<sup>-</sup> and CD27<sup>+</sup> B cells. Data are mean  $\pm$  SEM derived from analysis of B cells from subjects A, D, E, F ( $n = 4$ ). ND, not determined.

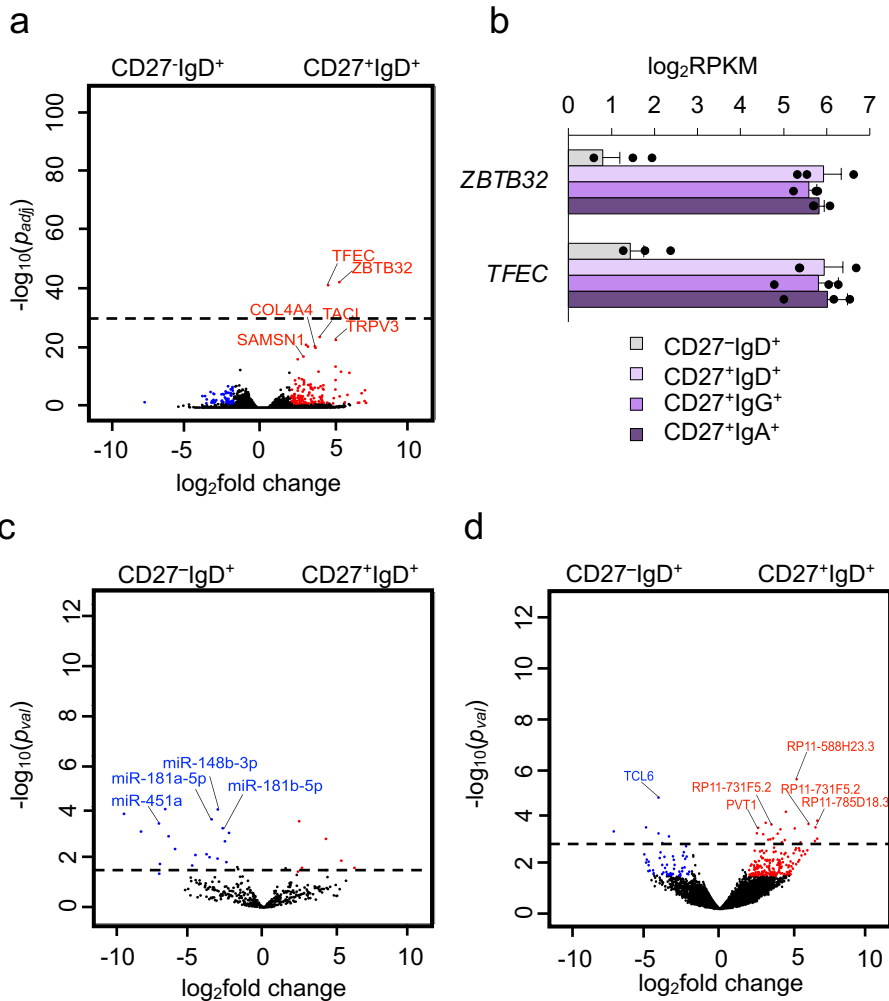

**Supplementary Fig. 3 Transcriptome analysis of human CD27<sup>+</sup>IgD<sup>+</sup> B cells.** (a,c,d) Global transcriptional differences in mRNA (a), miRNA (c) and lncRNA (d) in CD27<sup>+</sup>IgD<sup>+</sup> vs. CD27<sup>-</sup>IgD<sup>+</sup> B cells (from subjects B, C, G; n = 3) as depicted by volcano plot. All genes annotated in human GENCODE v24 GRCh38 are shown, with each circle representing 1 gene. Significantly altered RNA transcripts are highlighted in red (upregulated) or in blue (downregulated).  $-\log_{10}$ -transformed  $p_{adj}$  is shown on the y-axis for mRNA and  $-\log_{10}$ -transformed  $p$  is shown on the y-axis for miRNAs and lncRNAs.  $\log_2$ -transformed fold change of transcript expression is shown on the x-axis. DE mRNA, miRNA and lncRNA transcripts shared by swMBC signature and CD27<sup>+</sup>IgD<sup>+</sup> B cells are annotated. **b**, Normalized ( $\log_2$ RPKM) expression of the 2 most altered mRNA transcripts in CD27<sup>+</sup>IgD<sup>+</sup> unswMBCs as compared to CD27<sup>-</sup>IgD<sup>+</sup> NBCs, as depicted by histogram for each subset. Data are mean  $\pm$  SEM derived from analysis of B cells from subjects B, C, G (n = 3).

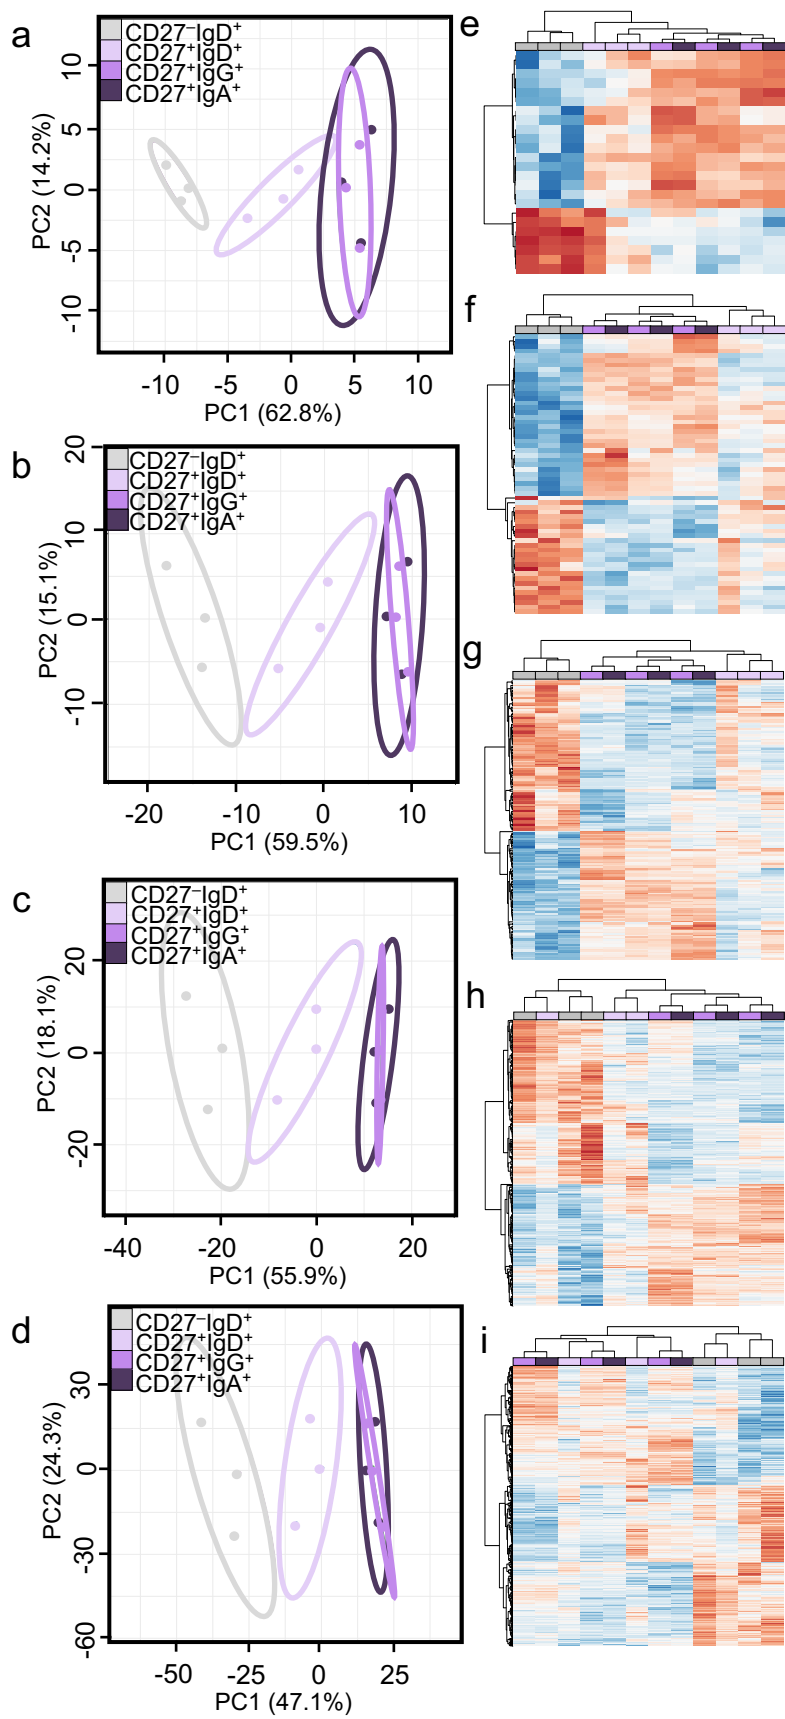

**Supplementary Fig. 4 Principal Component Analysis and unsupervised Euclidean hierarchical clustering of expanded DE gene profiles** **a**, Transcriptome clustering of the sorted B cell subsets performed using the 60 mRNAs DE between CD27<sup>+</sup>IgG<sup>+</sup> and CD27<sup>+</sup>IgA<sup>+</sup>swMBCs vs. CD27<sup>-</sup>IgD<sup>+</sup>NBCs ( $p_{adj} < 10 \times 10^{-20}$ ) is depicted by PCA plot (n = 3). **b**, Transcriptome clustering of the sorted B cell subsets performed using the 181 mRNAs DE between CD27<sup>+</sup>IgG<sup>+</sup> and CD27<sup>+</sup>IgA<sup>+</sup>swMBCs vs. CD27<sup>-</sup>IgD<sup>+</sup>NBCs ( $p_{adj} < 10 \times 10^{-10}$ ) is depicted by PCA plot (n = 3). **c**, Transcriptome clustering of the sorted B cell subsets performed using the 449 mRNAs DE between CD27<sup>+</sup>IgG<sup>+</sup> and CD27<sup>+</sup>IgA<sup>+</sup>swMBCs vs. CD27<sup>-</sup>IgD<sup>+</sup>NBCs ( $p_{adj} < 10 \times 10^{-5}$ ) is depicted by PCA plot (n = 3). **d**, Transcriptome clustering of the sorted B cell subsets performed using the 1074 mRNAs DE between CD27<sup>+</sup>IgG<sup>+</sup> and CD27<sup>+</sup>IgA<sup>+</sup>swMBCs vs. CD27<sup>-</sup>IgD<sup>+</sup>NBCs ( $p_{adj} < 0.05$ ) is depicted by PCA plot (n = 3). For **a**, **b**, **c**, **d**, prediction ellipses define 95% confidence intervals. Each symbol represents an individually sorted subset (n = 3). DEGs as determined by edgeR. **e**, Unsupervised hierarchical clustering of the sorted B cell subsets performed using the 24 mRNAs DE between CD27<sup>+</sup>IgG<sup>+</sup> and CD27<sup>+</sup>IgA<sup>+</sup>swMBCs vs. CD27<sup>-</sup>IgD<sup>+</sup>NBCs ( $p_{adj} < 10 \times 10^{-30}$ ) is depicted by heatmap and dendrogram. **f**, Unsupervised hierarchical clustering of the sorted B cell subsets performed using the 60 mRNAs DE between CD27<sup>+</sup>IgG<sup>+</sup> and CD27<sup>+</sup>IgA<sup>+</sup>swMBCs vs. CD27<sup>-</sup>IgD<sup>+</sup>NBCs ( $p_{adj} < 10 \times 10^{-20}$ ) is depicted by heatmap and dendrogram. **g**, Unsupervised hierarchical clustering of the sorted B cell subsets performed using the 181 mRNAs DE between CD27<sup>+</sup>IgG<sup>+</sup> and CD27<sup>+</sup>IgA<sup>+</sup>swMBCs vs. CD27<sup>-</sup>IgD<sup>+</sup>NBCs ( $p_{adj} < 10 \times 10^{-10}$ ) is depicted by heatmap and dendrogram. **h**, Unsupervised hierarchical clustering of the sorted B cell subsets performed using the 449 mRNAs DE between CD27<sup>+</sup>IgG<sup>+</sup> and CD27<sup>+</sup>IgA<sup>+</sup>swMBCs vs. CD27<sup>-</sup>IgD<sup>+</sup>NBCs ( $p_{adj} < 10 \times 10^{-5}$ ) is depicted by heatmap and dendrogram. **i**, Unsupervised hierarchical clustering of the sorted B cell subsets performed using the 1074 mRNAs DE between CD27<sup>+</sup>IgG<sup>+</sup> and CD27<sup>+</sup>IgA<sup>+</sup>swMBCs vs. CD27<sup>-</sup>IgD<sup>+</sup>NBCs ( $p_{adj} < 0.05$ ) is depicted by heatmap and dendrogram. For **e**, **f**, **g**, **h**, **i**, unsupervised hierarchical clustering was performed using Euclidean distance and average linkage, with vertical distances on each branch of the dendrogram representing the degree of similarity between gene expression profiles of the 4 MBC groups. DEGs as determined by edgeR.

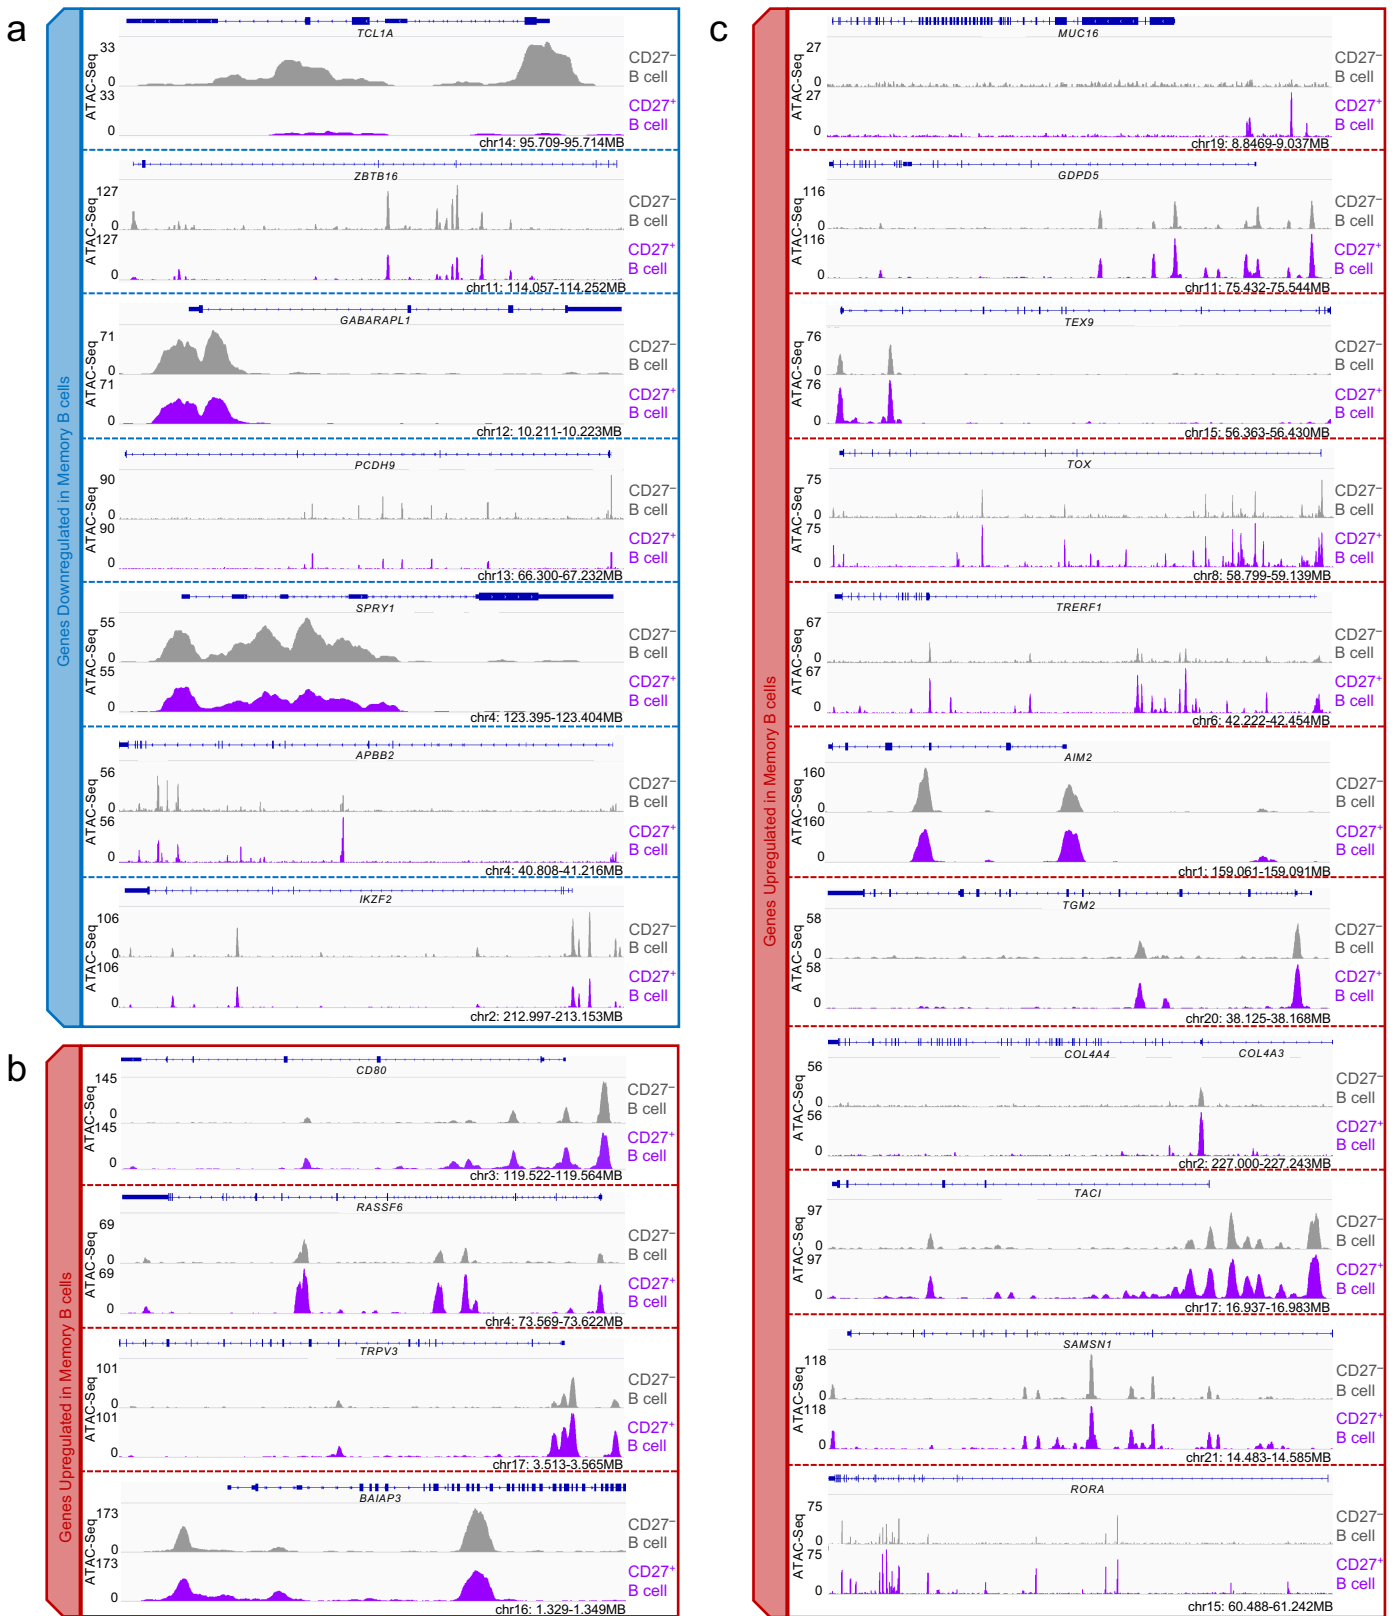

**Supplementary Fig. 5 Chromatin accessibility of signature genes in human swMBCs.** a-c Chromatin accessibility of human swMBC signature genes with decreased (a) and increased (b,c) expression is displayed by IGV gene tracks. Coverage includes gene introns, exons, promoter regions and potential enhancer regions. ATAC-Seq signal is normalized for the window of interest. NBCs depicted in grey and all MBCs in purple.

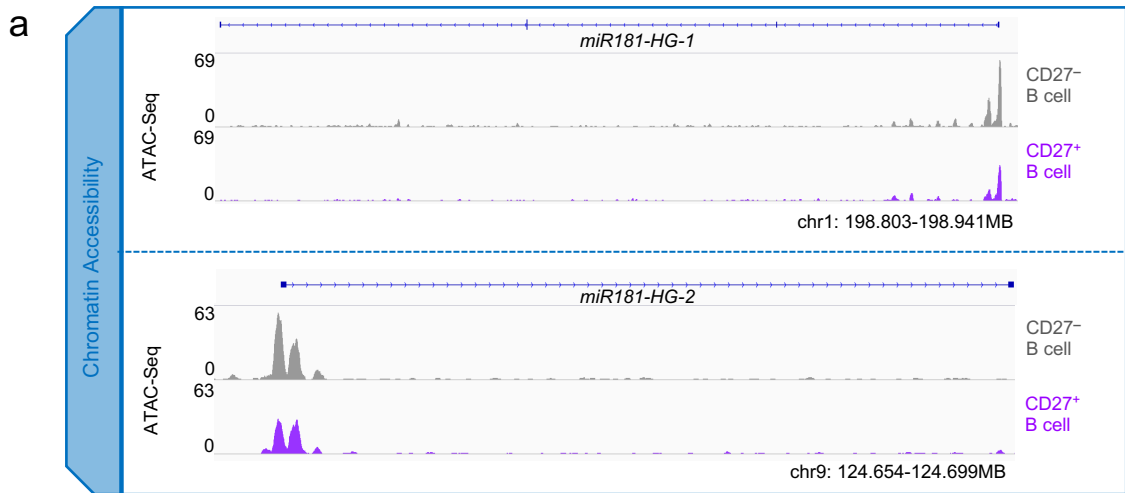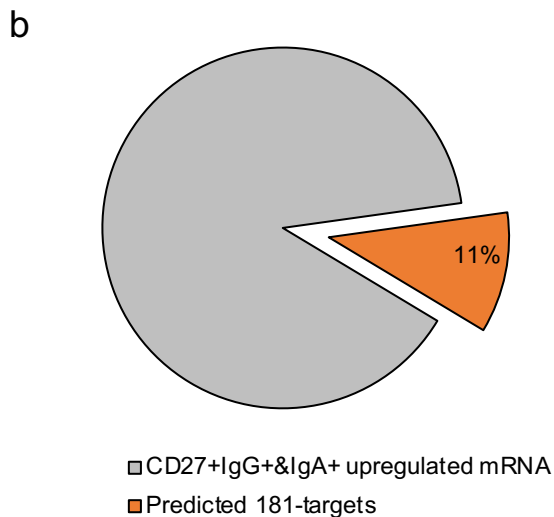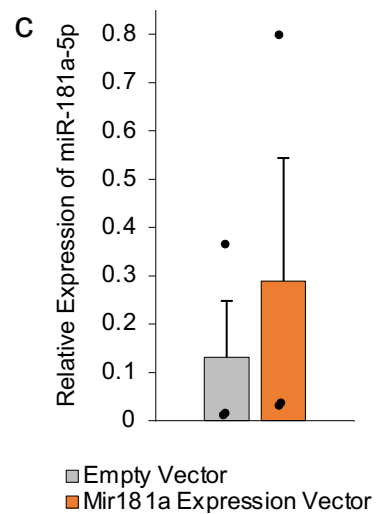

**Supplementary Fig. 6 MIR181 as a regulator of swMBC-specific gene expression.** **a**, Chromatin accessibility of MIR181 host genes on chromosomes 1 and 9 as depicted by IGV gene track. Coverage includes gene introns, exons, promoter regions and potential enhancer regions. ATAC-Seq signal is normalized for the window of interest, with NBCs depicted in grey and all MBCs in purple. **b**, The percentage of mRNAs upregulated in swMBCs (CD27<sup>+</sup>IgG<sup>+</sup> and CD27<sup>+</sup>IgA<sup>+</sup>;  $p_{adj} < 0.05$ ) that are predicted targets of MIR181a and MIR181b is depicted by the pie chart (50/462 mRNAs). **c**, Mir181a-5p expression (qPCR) in sorted (7AAD<sup>-</sup>CD19<sup>+</sup>GFP<sup>+</sup>) B cells transduced by MDH1-PGK-GFP (Empty Vector, n = 3) or MDH1-miR-181a-1-PGK-GFP (Mir181a Expression Vector, n = 3) retrovirus. Data are mean  $\pm$  SEM.



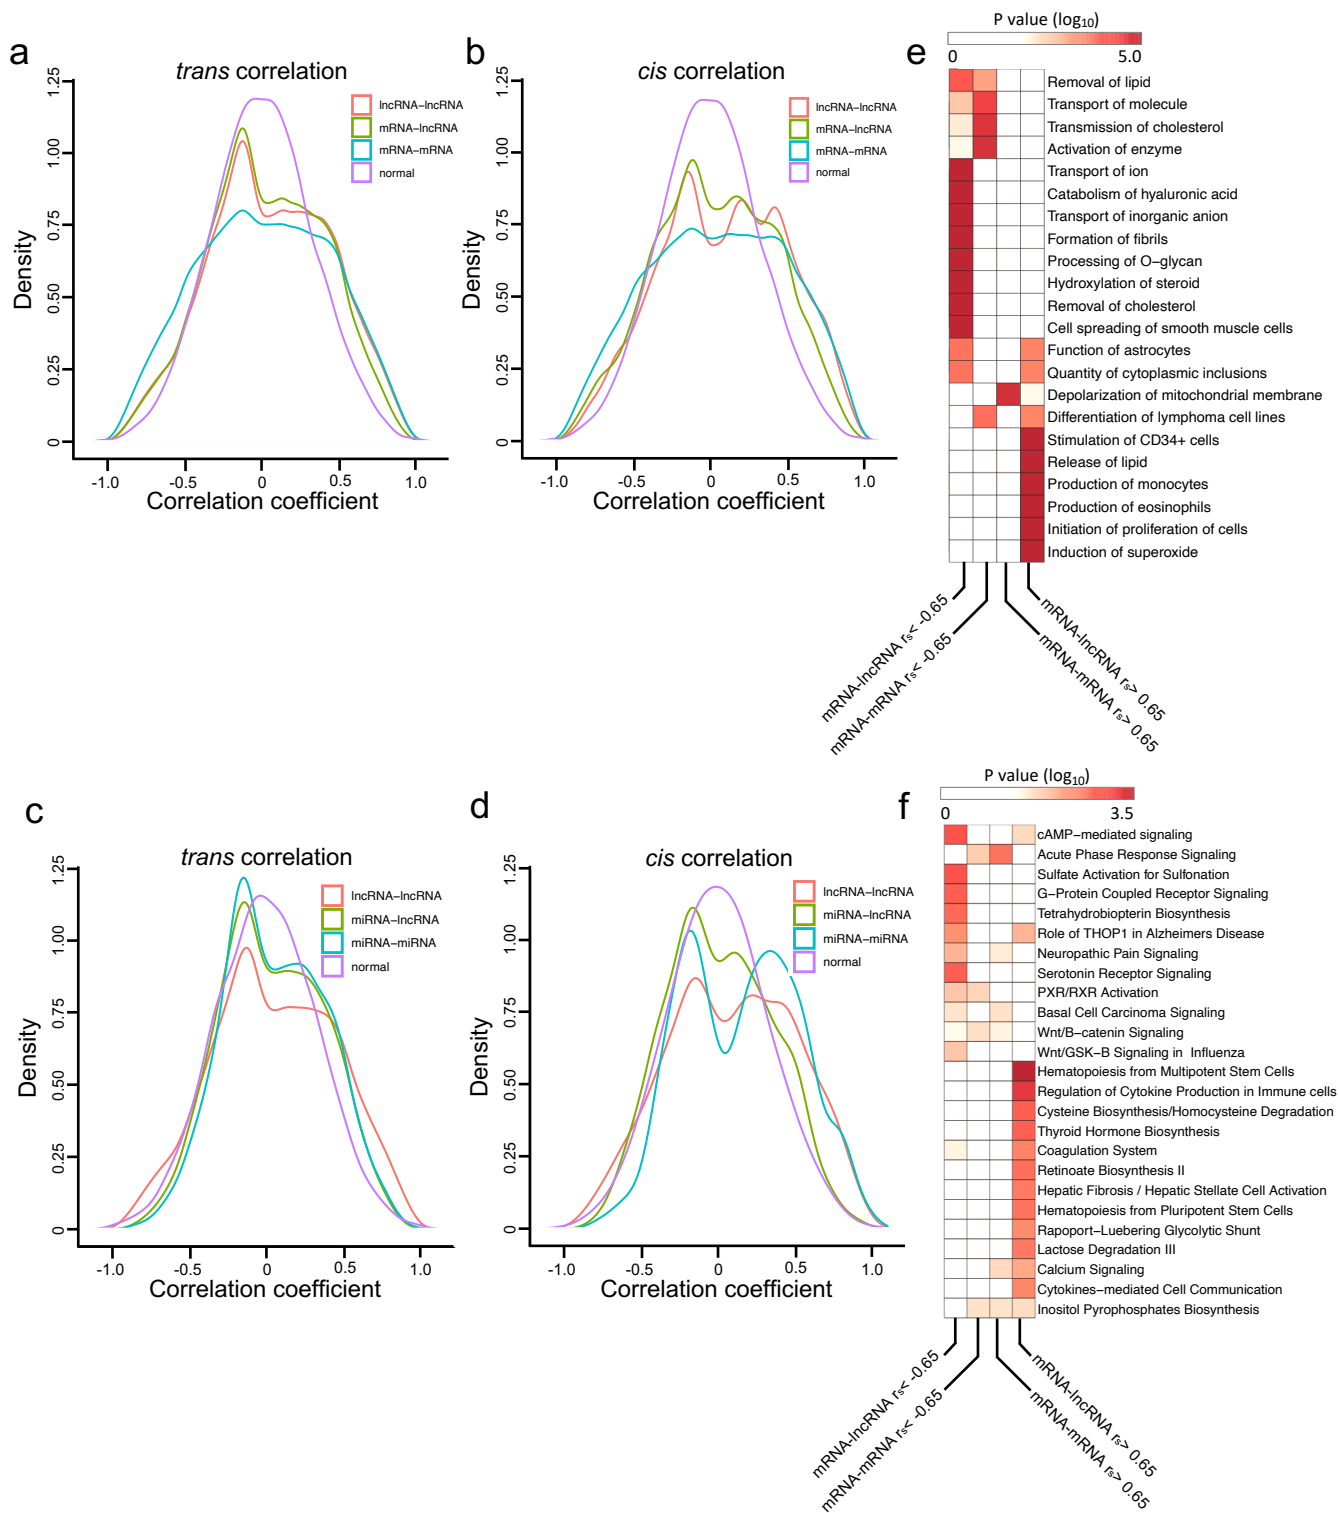

**Supplementary Fig. 7 Correlation of RNA species across human NBCs and MBCs. (a,b)** Spearman correlations between RNA species (*trans*, genome-wide pairs; *cis*, pairs within 1Mb) plotted by density histogram. IncRNA-IncRNA correlations, red; mRNA-IncRNA correlations, green; mRNA-mRNA correlations, blue; normal distribution, purple. **(c,d)** Spearman correlations between RNA species (*trans*, genome-wide pairs; *cis*, pairs within 1Mb) plotted by density histogram. IncRNA-IncRNA correlations, red; miRNA-IncRNA correlations, green; miRNA-miRNA correlations, blue; normal distribution, purple. **(e,f)** Gene ontology and pathway enrichment analysis of mRNA with strong ( $r_s \pm 0.65$ ) *cis* Spearman correlations to lncRNA or mRNA transcripts determined by over-representation analysis in IPA.  $-\log_{10}$ -transformed  $p$  of the most significant categories displayed by heatmap.

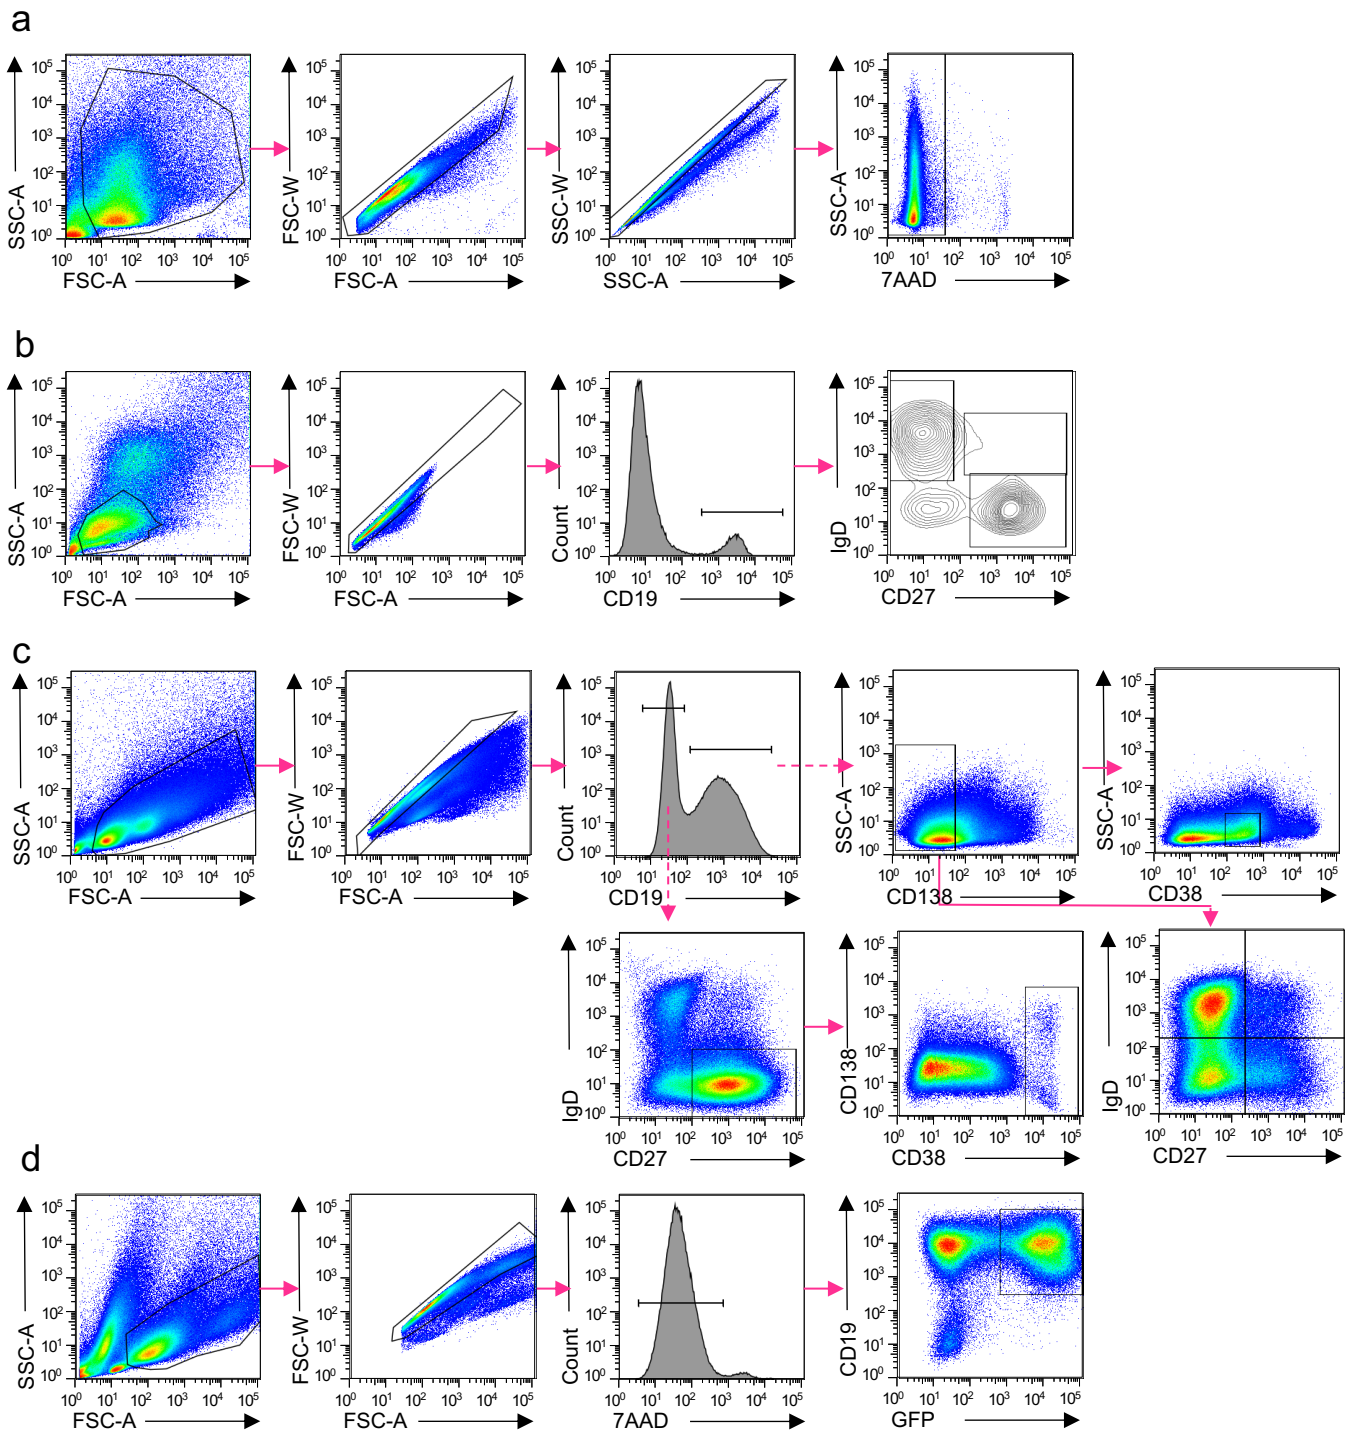

**Supplementary Figure 8. Gating strategy for flow cytometry analysis.** **a**, Gating strategy to analyze and sort NBCs, class switched MBCs and unswitched MBCs Fig. 1. **b**, Gating strategy to analyze intracellular ROR $\alpha$  expression in peripheral blood B cells presented in Fig. 5e. **c**, Gating strategy to analyze intracellular ROR $\alpha$  expression in tonsil B cells presented in Fig. 5f. **d**, Gating strategy to analyze and sort retrovirally transduced B cells Fig. 8c.

## Supplementary Tables

**Supplementary Table 1. Human subjects (7) studied.**

| Subject        | Age          | Sex    | Race Ethnicity      | CD27-IgD <sup>+</sup> | CD27 <sup>+</sup> IgD <sup>+</sup> | CD27 <sup>+</sup> IgG <sup>+</sup> | CD27 <sup>+</sup> IgA <sup>+</sup> | B cell isolation                                                                                                                         | ATAC | mRNA | miRNA | lncRNA |
|----------------|--------------|--------|---------------------|-----------------------|------------------------------------|------------------------------------|------------------------------------|------------------------------------------------------------------------------------------------------------------------------------------|------|------|-------|--------|
| A <sup>†</sup> | 20           | Female | White               | 73.2%                 | 3.50%                              | 5.81%                              | 4.20%                              | CD27-<br>total CD27 <sup>+</sup>                                                                                                         | Yes  | Yes  | ---   | ---    |
| B <sup>*</sup> | 20           | Female | Multi-racial        | 52.6%                 | 15.9%                              | 12.57%                             | 7.37%                              | CD27- IgD <sup>+</sup><br>CD27 <sup>+</sup> IgD <sup>+</sup><br>CD27 <sup>+</sup> IgG <sup>+</sup><br>CD27 <sup>+</sup> IgA <sup>+</sup> | ---  | Yes  | Yes   | Yes    |
| C <sup>*</sup> | 21           | Male   | White               | 78.8%                 | 6.28%                              | 3.62%                              | 2.54%                              | CD27- IgD <sup>+</sup><br>CD27 <sup>+</sup> IgD <sup>+</sup><br>CD27 <sup>+</sup> IgG <sup>+</sup><br>CD27 <sup>+</sup> IgA <sup>+</sup> | ---  | Yes  | Yes   | Yes    |
| D <sup>†</sup> | 33           | Male   | White               | 45.3%                 | 25.6%                              | 8.14%                              | 5.58%                              | CD27-<br>total CD27 <sup>+</sup>                                                                                                         | Yes  | Yes  | ---   | ---    |
| E <sup>†</sup> | 35           | Female | White<br>Hispanic   | 50.1%                 | 2.36%                              | 5.86%                              | 7.79%                              | CD27-<br>total CD27 <sup>+</sup>                                                                                                         | Yes  | Yes  | ---   | ---    |
| F <sup>†</sup> | 36           | Male   | African<br>American | 68.2%                 | 5.75%                              | 5.88%                              | 4.13%                              | CD27-<br>total CD27 <sup>+</sup>                                                                                                         | Yes  | Yes  | ---   | ---    |
| G <sup>*</sup> | 39           | Male   | White               | 79.2%                 | 8.19%                              | 3.66%                              | 2.99%                              | CD27- IgD <sup>+</sup><br>CD27 <sup>+</sup> IgD <sup>+</sup><br>CD27 <sup>+</sup> IgG <sup>+</sup><br>CD27 <sup>+</sup> IgA <sup>+</sup> | ---  | Yes  | Yes   | Yes    |
| <b>Mean</b>    | 29.1<br>±8.4 | 3F/4M  | N/A                 | 63.9±14.3%            | 9.7±8.3%                           | 6.5±3.1%                           | 4.9±2.0%                           | N/A                                                                                                                                      | N/A  | N/A  | N/A   | N/A    |

\* Subjects B, C, G: 4 B cell fractions sorted (CD27-IgD<sup>+</sup>, CD27<sup>+</sup>IgD<sup>+</sup>, CD27<sup>+</sup>IgG<sup>+</sup>, and CD27<sup>+</sup>IgA<sup>+</sup>), mRNA, miRNA, lncRNA sequencing.

† Subjects A, D, E, F: 2 B cell fractions sorted (CD27<sup>-</sup> and CD27<sup>+</sup>), mRNA sequencing, ATAC (assay for transposase accessible chromatin).

**Supplementary Table 2. Memory B cell gene functions.**

| Upregulated Genes   |                                                                  |              |                                                        |
|---------------------|------------------------------------------------------------------|--------------|--------------------------------------------------------|
| Gene Name           | Protein Identifier                                               | Localization | Function                                               |
| <i>MUC16*</i>       | Mucin 16                                                         | PM           | Adhesion molecule/signal transduction                  |
| <i>GDPD5*</i>       | Glycerophosphodiester Phosphodiesterase Domain Containing 5      | PM/ER        | Lipid metabolism                                       |
| <i>TEX9*</i>        | Testis Expressed 9                                               | C            | Unknown                                                |
| <i>TOX*</i>         | Thymocyte Selection Associated High Mobility Group Box           | N            | High motility group-box transcription factor           |
| <i>TRERF1*</i>      | Transcriptional Regulating Factor 1                              | N/C          | Zinc-finger transcription factor                       |
| <i>AIM2*</i>        | Absent In Melanoma 2                                             | M/N/C        | Inflammasome activation                                |
| <i>TGM2*</i>        | Transglutaminase 2                                               | PM/EC/M/C    | Calcium-dependent protein crosslinking                 |
| <i>C10orf128*</i>   | Chromosome 10 Open Reading Frame 128                             | PM           | Unknown function                                       |
| <i>RASSF6*</i>      | Ras Association Domain Family Member 6                           | N/C          | Tumor suppressor/Self-renewal signaling                |
| <i>TRPV3*</i>       | Transient Receptor Potential Cation Channel Subfamily V Member 3 | PM           | Calcium-permeable temperature-sensitive cation channel |
| <i>BAIAP3</i>       | BAI1 Associated Protein 3                                        | ER           | Calcium stimulated exocytosis                          |
| <i>COL4A3</i>       | Collagen Type IV Alpha 3 Chain                                   | EC/ER/N      | Structural component                                   |
| <i>TNFRSF13B</i>    | TNF Receptor Superfamily Member 13B (TACI)                       | PM           | BAFF/APRIL receptor                                    |
| <i>SAMSN1</i>       | SAM Domain, SH3 Domain And Nuclear Localization Signals 1        | N/C          | Negative regulator of B-cell activation.               |
| <i>CD80</i>         | B7-1 Antigen                                                     | PM           | Co-stimulatory Molecule                                |
| <i>RORA</i>         | Retinoic Acid Receptor-Related Orphan Receptor Alpha             | N/C          | Transcription factor                                   |
| <i>COL4A4</i>       | Collagen Type IV Alpha 4 Chain                                   | EC/ER/N      | Structural component                                   |
| Downregulated Genes |                                                                  |              |                                                        |
| Gene Name           | Protein Identifier                                               | Localization | Function                                               |
| <i>IGHD*</i>        | Immunoglobulin Heavy Constant Delta                              | PM/EC        | Immunoglobulin constant region                         |
| <i>APBB2*</i>       | Amyloid Beta Precursor Protein Binding Family B Member 2         | N/M/C        | Signal transduction molecule                           |
| <i>TCL1A*</i>       | T Cell Leukemia/Lymphoma 1A                                      | N/ER         | Signal transduction                                    |
| <i>IKZF2</i>        | IKAROS Family Zinc Finger 2(Helios)                              | N            | Transcription factor                                   |
| <i>ZBTB16</i>       | Zinc Finger And BTB Domain Containing 16 (PLZF)                  | N/C          | Kruppel-like Transcription factor                      |
| <i>PCDH9</i>        | Protocadherin 9                                                  | PM           | Calcium-dependent adhesion molecule                    |
| <i>SPRY1</i>        | Sprouty RTK Signaling Antagonist 1                               | PM/N/C/GA    | Antagonist of B cell proliferation signaling           |
| <i>GABARAPL1</i>    | GABA Type A Receptor Associated Protein Like 1                   | C/ER/GA      | Autophagy                                              |

PM=Plasma Membrane; ER=Endoplasmic Reticulum; N=Nucleus; C=cytosol; EC=Extracellular; GA=Golgi Apparatus; M=mitochondria . Localization ordered according to UniProt confidence

Genes annotated with “ \* ” are differentially expressed with a Fold change >±32

**Supplementary Table 3. Pairwise gene expression correlation analysis**

| Correlation Type | Pair class    | Total number of correlations | Spearman correlation threshold: percent of pairs |          |          |          |          |          |          |          |          |          |
|------------------|---------------|------------------------------|--------------------------------------------------|----------|----------|----------|----------|----------|----------|----------|----------|----------|
|                  |               |                              | rho>0                                            | rho>0.1  | rho>0.2  | rho>0.3  | rho>0.4  | rho>0.5  | rho>0.6  | rho>0.7  | rho>0.8  | rho>0.9  |
|                  |               |                              | rho<0                                            | rho<-0.1 | rho<-0.2 | rho<-0.3 | rho<-0.4 | rho<-0.5 | rho<-0.6 | rho<-0.7 | rho<-0.8 | rho<-0.9 |
| <b>Trans</b>     |               |                              |                                                  |          |          |          |          |          |          |          |          |          |
|                  | mRNA-mRNA     | 205093101                    |                                                  |          |          |          |          |          |          |          |          |          |
|                  |               |                              | 50.978                                           | 43.830   | 36.572   | 29.361   | 21.507   | 14.788   | 9.580    | 5.203    | 2.167    | 0.439    |
|                  |               |                              | 49.022                                           | 41.237   | 33.585   | 26.376   | 18.840   | 12.990   | 8.412    | 4.571    | 1.865    | 0.331    |
|                  | lncRNA-lncRNA | 2080054                      |                                                  |          |          |          |          |          |          |          |          |          |
|                  |               |                              | 53.211                                           | 45.873   | 38.212   | 30.375   | 21.734   | 14.308   | 9.285    | 5.041    | 2.056    | 0.408    |
|                  |               |                              | 46.789                                           | 37.545   | 27.964   | 20.090   | 12.456   | 8.005    | 5.048    | 2.662    | 0.986    | 0.143    |
|                  | miRNA-miRNA   | 26191                        |                                                  |          |          |          |          |          |          |          |          |          |
|                  |               |                              | 53.297                                           | 44.561   | 35.520   | 25.826   | 16.582   | 9.047    | 5.040    | 2.130    | 0.540    | 0.084    |
|                  |               |                              | 46.703                                           | 35.959   | 23.218   | 13.974   | 6.819    | 3.394    | 1.546    | 0.530    | 0.180    | 0.011    |
|                  | mRNA-lncRNA   | 8717824                      |                                                  |          |          |          |          |          |          |          |          |          |
|                  |               |                              | 51.248                                           | 43.485   | 35.405   | 27.347   | 18.708   | 11.392   | 6.756    | 3.294    | 1.123    | 0.168    |
|                  |               |                              | 48.753                                           | 39.081   | 29.041   | 20.663   | 12.573   | 7.952    | 4.930    | 2.600    | 0.968    | 0.146    |
|                  | mRNA-miRNA    | 4621095                      |                                                  |          |          |          |          |          |          |          |          |          |
|                  |               |                              | 49.909                                           | 40.902   | 31.873   | 23.193   | 14.479   | 8.037    | 4.048    | 1.580    | 0.400    | 0.042    |
|                  |               |                              | 50.091                                           | 40.055   | 29.607   | 20.507   | 11.754   | 6.194    | 3.024    | 1.160    | 0.290    | 0.030    |
|                  | miRNA-lncRNA  | 455194                       |                                                  |          |          |          |          |          |          |          |          |          |
|                  |               |                              | 51.942                                           | 43.299   | 34.325   | 25.186   | 16.025   | 9.066    | 4.707    | 1.840    | 0.42     | 0.046    |
|                  |               |                              | 48.058                                           | 37.758   | 26.113   | 16.879   | 8.763    | 4.425    | 2.074    | 0.780    | 0.19     | 0.013    |
| <b>Cis</b>       |               |                              |                                                  |          |          |          |          |          |          |          |          |          |
|                  | mRNA-mRNA     | 291958                       |                                                  |          |          |          |          |          |          |          |          |          |
|                  |               |                              | 54.017                                           | 47.277   | 40.298   | 33.274   | 25.635   | 18.706   | 12.955   | 7.651    | 3.6402   | 0.9539   |
|                  |               |                              | 45.983                                           | 38.657   | 31.603   | 24.913   | 18.091   | 12.543   | 8.094    | 4.375    | 1.7931   | 0.30792  |
|                  | lncRNA-lncRNA | 2842                         |                                                  |          |          |          |          |          |          |          |          |          |
|                  |               |                              | 57.002                                           | 50.281   | 42.927   | 34.588   | 26.950   | 18.508   | 12.491   | 7.424    | 3.131    | 0.809    |
|                  |               |                              | 42.998                                           | 35.362   | 26.249   | 19.493   | 12.421   | 7.987    | 4.821    | 2.322    | 0.739    | 0.105    |
|                  | miRNA-miRNA   | 234                          |                                                  |          |          |          |          |          |          |          |          |          |
|                  |               |                              | 59.402                                           | 55.983   | 47.436   | 38.034   | 28.632   | 20.512   | 12.393   | 7.690    | 4.270    | 0.855    |
|                  |               |                              | 40.598                                           | 32.051   | 20.940   | 13.248   | 3.846    | 2.136    | 1.282    | 0.430    | 0        | 0        |
|                  | mRNA-lncRNA   | 9592                         |                                                  |          |          |          |          |          |          |          |          |          |
|                  |               |                              | 52.637                                           | 44.995   | 36.853   | 28.774   | 20.558   | 12.875   | 8.110    | 3.972    | 1.574    | 0.260    |
|                  |               |                              | 47.362                                           | 37.979   | 29.232   | 21.820   | 13.667   | 8.892    | 5.535    | 3.054    | 1.105    | 0.135    |
|                  | mRNA-miRNA    | 7148                         |                                                  |          |          |          |          |          |          |          |          |          |
|                  |               |                              | 49.077                                           | 39.647   | 30.162   | 22.440   | 14.088   | 7.946    | 4.155    | 1.510    | 0.340    | 0.028    |
|                  |               |                              | 50.923                                           | 40.697   | 30.918   | 21.600   | 12.927   | 7.302    | 3.945    | 1.550    | 0.410    | 0.042    |
|                  | miRNA-lncRNA  | 596                          |                                                  |          |          |          |          |          |          |          |          |          |
|                  |               |                              | 49.329                                           | 40.604   | 31.711   | 23.154   | 15.101   | 8.389    | 3.691    | 1.680    | 0.500    | 0        |
|                  |               |                              | 50.671                                           | 40.940   | 28.188   | 20.302   | 11.577   | 6.208    | 2.181    | 0.670    | 0.170    | 0        |
